# Supplementary material for: Comprehensive Mapping of the Escherichia coli Flagellar Regulatory Network
Source: PubMed Central journal article supplement (PMC4183435; doi:10.1371/journal.pgen.1004649), 2014-10-02

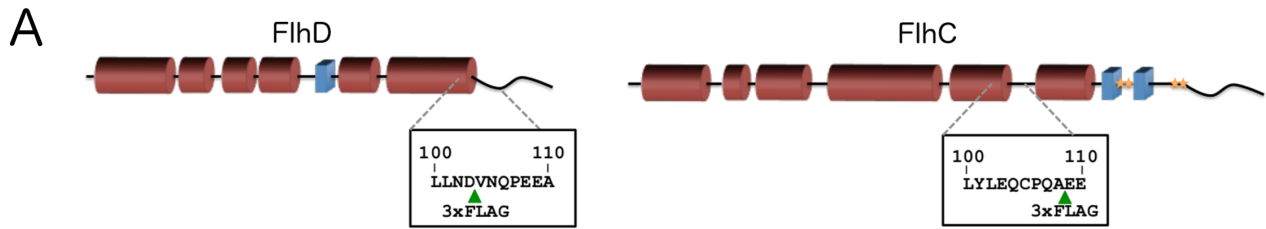

**B**

TTGTGCGGNNNNGTCTGTTTAAAAATAGCTTATCTGGTATTGCATGAAAGTGATTATTTATAGCAGATGATTATTACGGTGAGTTATT  
 TTGACTGTGCGCAACATCCCATTTTCGATTATTCCTGTTTCATTTTGCCTTGCTAGCGTAGCGAAAACCTTTTAAACAGATTGAAATACAC  
 CCAAAACAAAAGTATGACTTATACATTTATGTTAAGTAATTGAGTGTGTTTGTGTGATCTGCATCACGCATTATTGAAAATCGCAGCCCCC  
 CTCCGTTGTATGTGCGTGTAGTGACGAGTACAGTTGCGTCAATTAGGAAAAATCTTAGATAAGTGAAAGACCCATTCTATTTGTAAG  
 GACATATTAACCAAAAAGGTGGTTCTGCTTATTGCGACTTATCGCAACTATTCTAATGCTAATTATTTTTTACGGGGCTCCCGCGCA  
 CNTCACGGGTGCGGTGAAACCGCATAAAAATAAAGTTGGTTATCTGGGTGGGAATAATG

FliA-IS5 (→) FlhC-IS1 (←)  
 motile MG1655-IS5 (→) FlhD-IS3 (←)  
 TSS (+1)  
 Start codon ATG

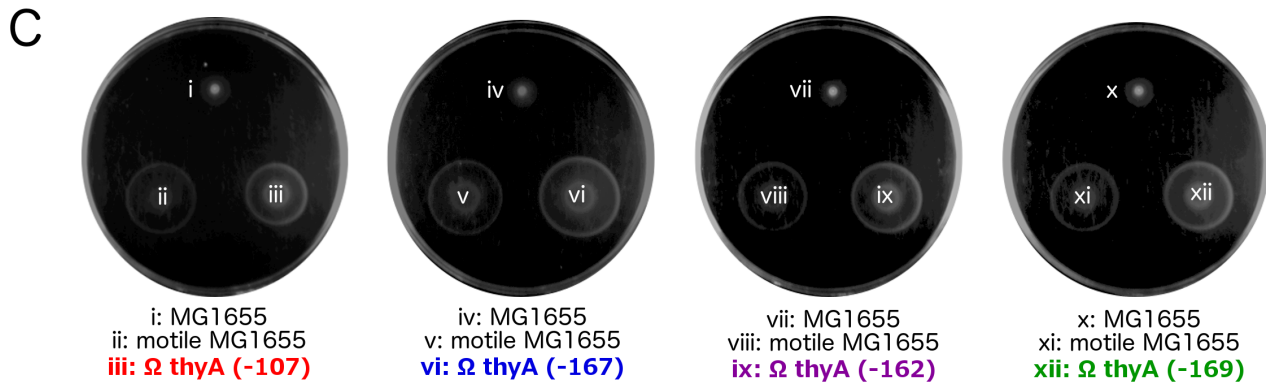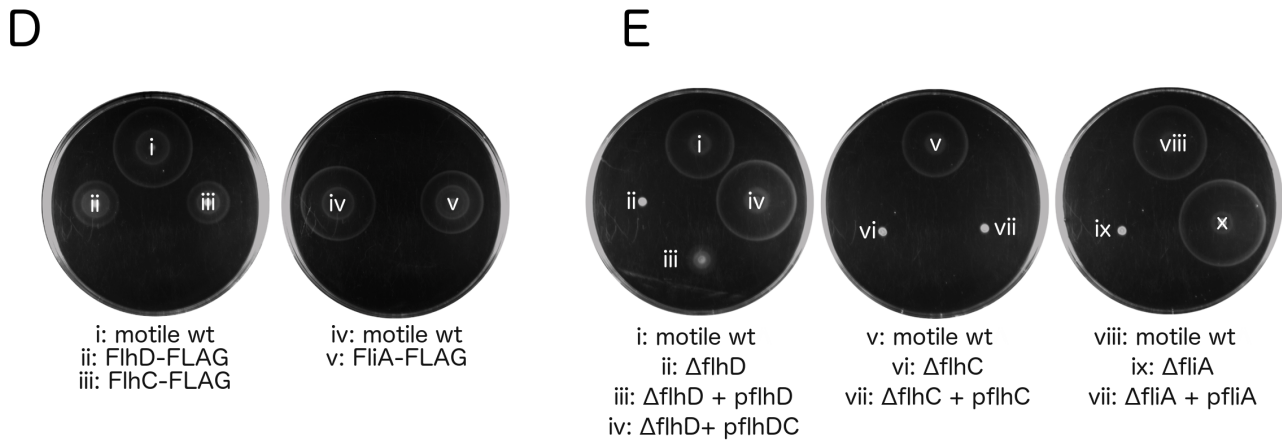

Supplement: pgen.1004649.s001.pdf [file pgen.1004649.s001.pdf]
