# Supplementary material for: Comprehensive Mapping of the Escherichia coli Flagellar Regulatory Network
Source: PubMed Central journal article supplement (PMC4183435; doi:10.1371/journal.pgen.1004649), 2014-10-02

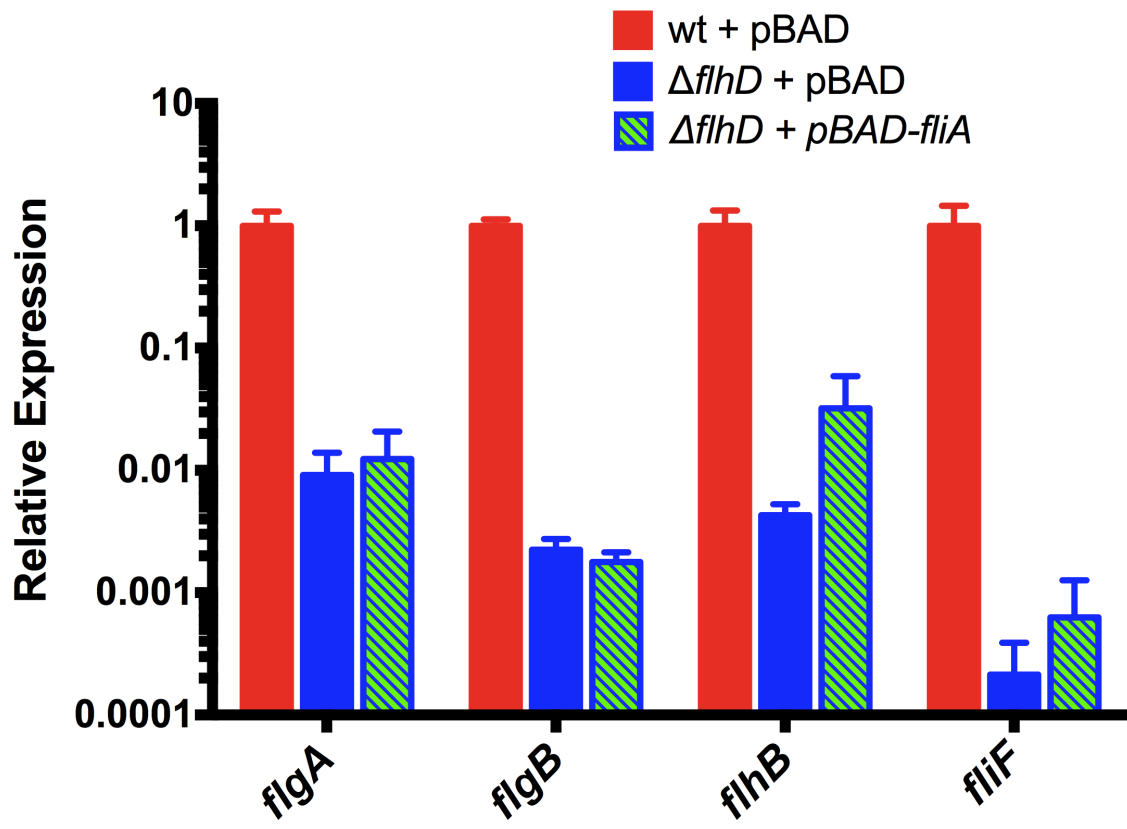

Supplement: pgen.1004649.s006.pdf [file pgen.1004649.s006.pdf]
